# Supplementary material for: Pioglitazone Enhances Cytosolic Lipolysis, β-oxidation and Autophagy to Ameliorate Hepatic Steatosis
Source: PubMed Central journal article supplement (PMC5567271; doi:10.1038/s41598-017-09702-3), 2017-08-22
Supplement: 41598_2017_9702_MOESM1_ESM.pdf [file 41598_2017_9702_MOESM1_ESM.pdf]

**Pioglitazone Enhances Cytosolic Lipolysis,  $\beta$ -oxidation and Autophagy to  
Ameliorate Hepatic Steatosis**

Pi-Jung Hsiao<sup>1,4</sup>, Hsin-Ying Clair Chiou<sup>1</sup>, He-Jiun Jiang<sup>1</sup>, Mei-Yueh Lee<sup>1,4</sup>,  
Tusty-Jiuan Hsieh<sup>2,4</sup>, Kung-Kai Kuo<sup>3,4</sup>

<sup>1</sup>Division of Endocrinology and Metabolism, Department of Internal Medicine;  
Kaohsiung Medical University Hospital; <sup>2</sup>Graduate Institute of Medicine, Kaohsiung  
Medical University; <sup>3</sup>Hepatobiliary Division, Department of Surgery, Kaohsiung  
Medical University Hospital; <sup>4</sup>School of Medicine, College of Medicine, Kaohsiung  
Medical University

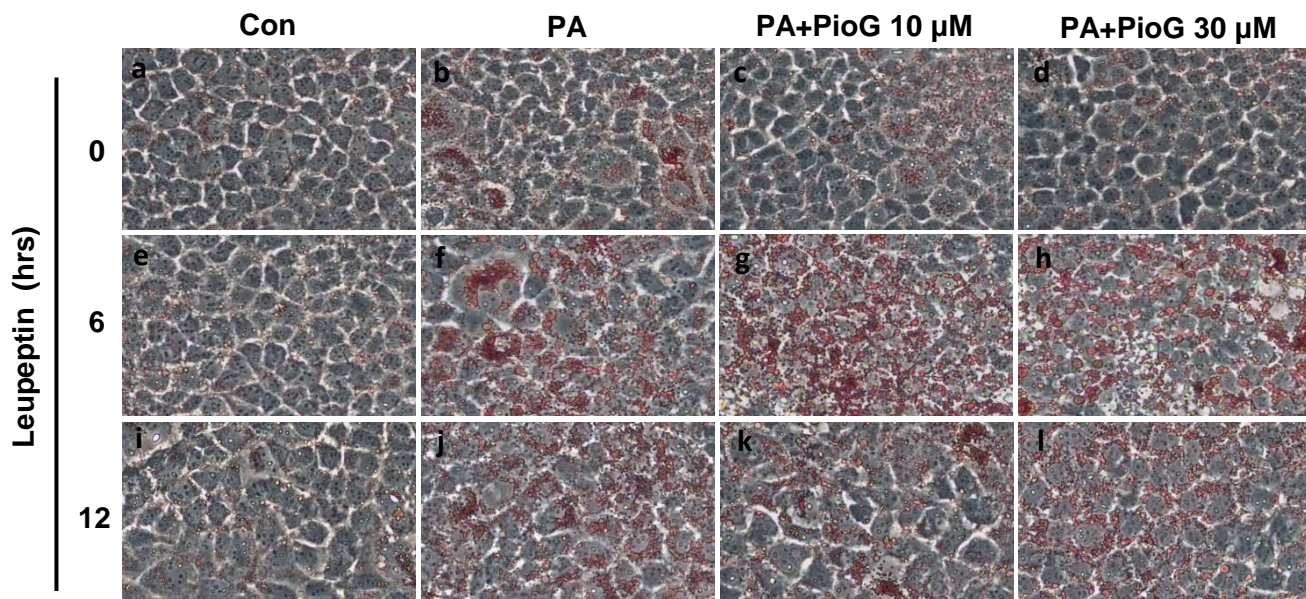

**Supplementary Fig. S1: Leupeptin inhibits lipophagy induced by pioglitazone.** AML12 cells, incubated with PA and pioglitazone as indicated for 48 hours, were then treated with leupeptin (100  $\mu$ M) for 6 and 12 hours. The lipid content was determined by Oil-red O stain. Magnifications, 200X.
